# Supplementary material for: Propylene synthesis via isomerization–metathesis of 1-hexene and FCC olefins
Source: Royal Society of Chemistry journal article supplement (doi:10.1039/d1cy00269d), 2021-01-01
Supplement: d1cy00269d1.pdf [file d1cy00269d1.pdf]

## Supporting information

### Propylene Synthesis via Isomerization Metathesis of 1-Hexene and FCC olefins

Gyula Novodárszki,<sup>a</sup> Blanka Szabó,<sup>a</sup> Róbert Auer,<sup>b</sup> Katalin Tóth,<sup>b</sup> László Leveles,<sup>b</sup> Róbert Barthos,<sup>a</sup> Gábor Turczel,<sup>a</sup> Zoltán Pászti,<sup>a</sup> József Valyon,<sup>a</sup> Magdolna R. Mihályi,<sup>\*a</sup> and Róbert Tuba<sup>\*a</sup>

<sup>a</sup>Institute of Materials and Environmental Chemistry, Research Centre for Natural Sciences  
Magyar tudósok körútja 2., 1519 Budapest, P.O. Box 286. Hungary  
E-mail: [tuba.robert@ttk.hu](mailto:tuba.robert@ttk.hu)

<sup>b</sup>MOL, Hungarian Oil and Gas Public Limited Company, Október huszonharmadika u. 18., 1117 Budapest, Hungary

**Table S1** Propylene yield in ISOMET of 1-hexene (1-H) with ethylene over activated and reactivated 6MoO<sub>3</sub>/HBEA catalyst at different temperatures and 0.5 h and 3 h of TOS, at 3 g<sub>cat</sub> g<sub>1-H</sub><sup>-1</sup> h space time under 3 bar ethylene pressure. The ethylene/1-hexene molar ratio was 10.

| Temperature (°C) | TOS (h) | Propylene Yield (%)    |                          |
|------------------|---------|------------------------|--------------------------|
|                  |         | Activated <sup>a</sup> | Reactivated <sup>b</sup> |
| 75               | 0.5     | 12                     | 17                       |
|                  | 3       | 4                      | 5                        |
| 100              | 0.5     | 11                     | 18                       |
|                  | 3       | 7                      | 8                        |
| 125              | 0.5     | 14                     | 21                       |
|                  | 3       | 9                      | 11                       |
| 150              | 0.5     | 15                     | 19                       |
|                  | 3       | 4                      | 7                        |

<sup>a</sup>Activation: The *ex-situ* calcined catalyst was *in-situ* pre-treated in a flow of Ar (50 ml min<sup>-1</sup>) at 550 °C for 2 h. The activated catalyst was cooled to the target temperature in a flow of Ar and the ISOMET reaction was performed.

<sup>b</sup>Reactivation: After 3 h of TOS, the reactant feed was stopped, the total pressure was reduced to atmospheric pressure. The catalyst was purged with a flow of Ar (50 ml min<sup>-1</sup>) for 30 min at the reaction temperature to remove olefins, then heated to 550 °C at a ramp rate of 10 °C min<sup>-1</sup>, and maintained at this temperature for 2 h. The reactivated catalyst thus obtained was cooled to the target temperature in a flow of Ar and the ISOMET reaction was performed again.

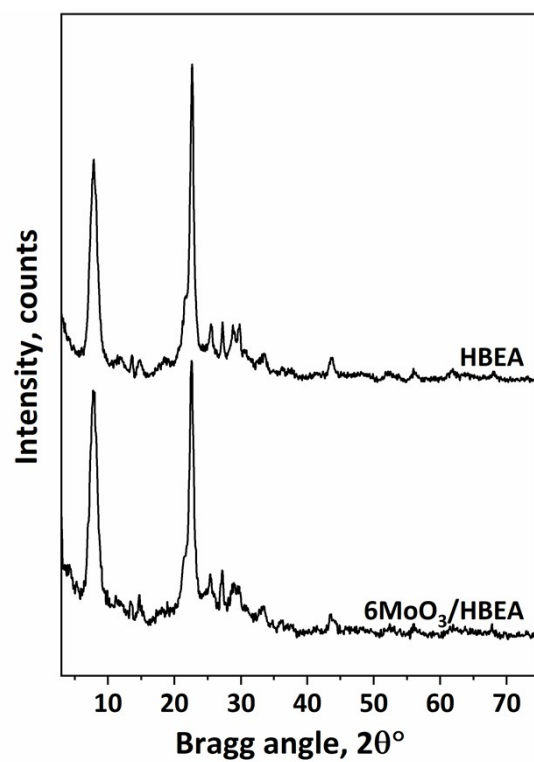

**Fig. S1** XRD patterns of HBEA support and 6MoO<sub>3</sub>/HBEA catalyst calcined at 500 °C. The diffractograms were recorded at room temperature.

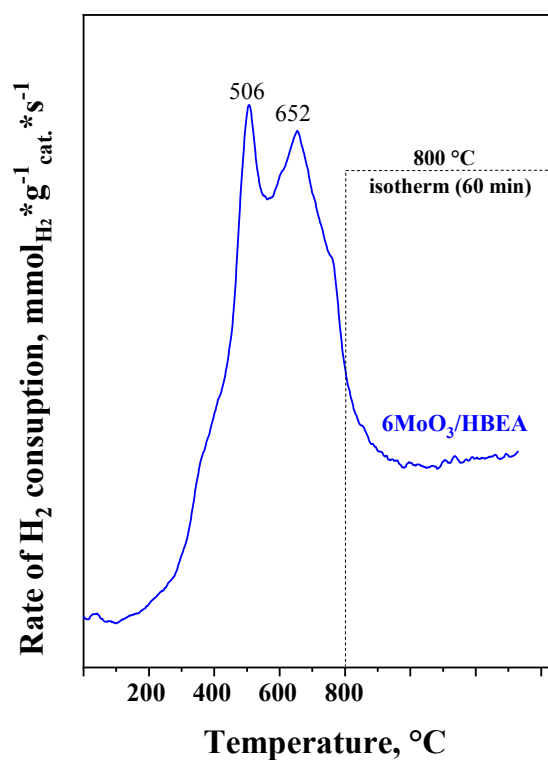

**Fig. S2** H<sub>2</sub>-TPR curve of the 6MoO<sub>3</sub>/HBEA catalyst. The catalyst was treated in O<sub>2</sub> in a flow rate of 30 ml/min for 1 h at 500 °C, cooled to 25 °C and then heated at a rate of 10 °C min<sup>-1</sup> up to 800 °C for 1 h in a flow of 9 % H<sub>2</sub>/N<sub>2</sub> mixture.

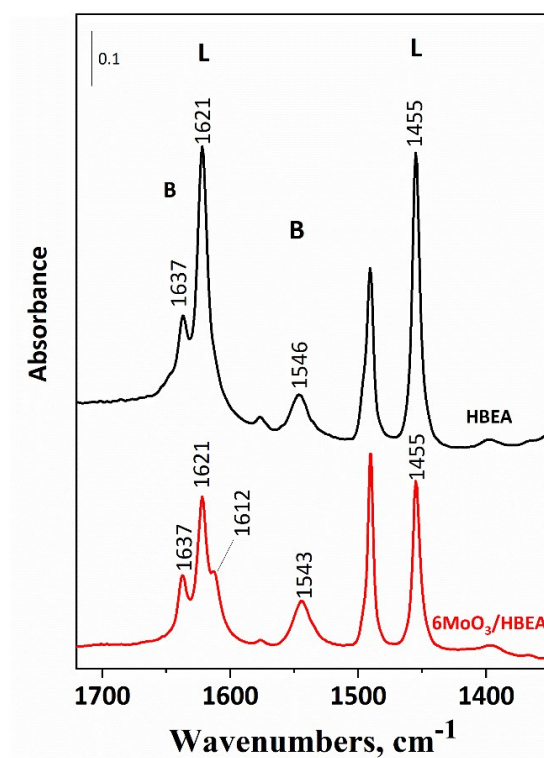

**Fig. S3** FT-IR spectra of pyridine adsorbed on the HBEA support and 6MoO<sub>3</sub>/HBEA catalyst. The samples were activated in high vacuum at 550 °C. Pre-treated samples were contacted with Py vapour at 5 mbar, 200 °C for 30 min, and evacuated for 30 min. After evacuation, the spectra were recorded at room temperature. Labels L and B indicate the characteristic bands for Py bonded to Lewis and Brønsted acid sites, respectively.

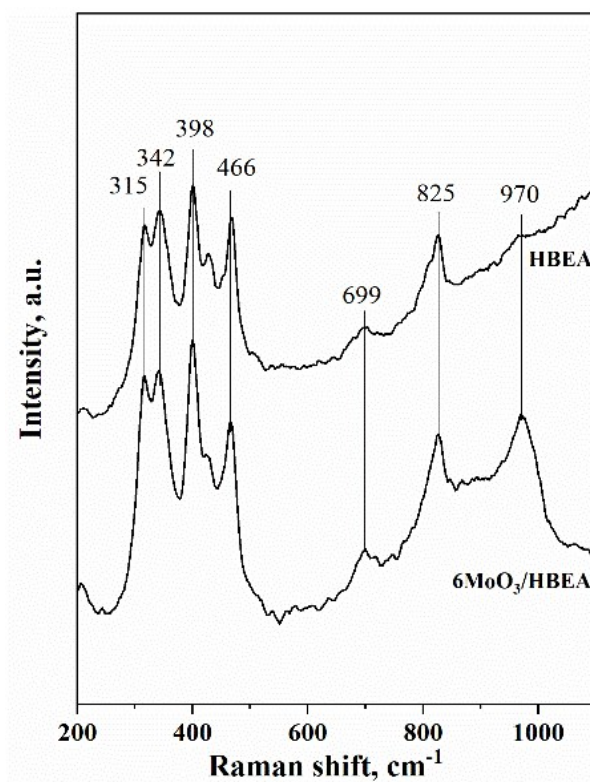

**Fig. S4** Raman spectra of HBEA support and 6MoO<sub>3</sub>/HBEA at ambient conditions.

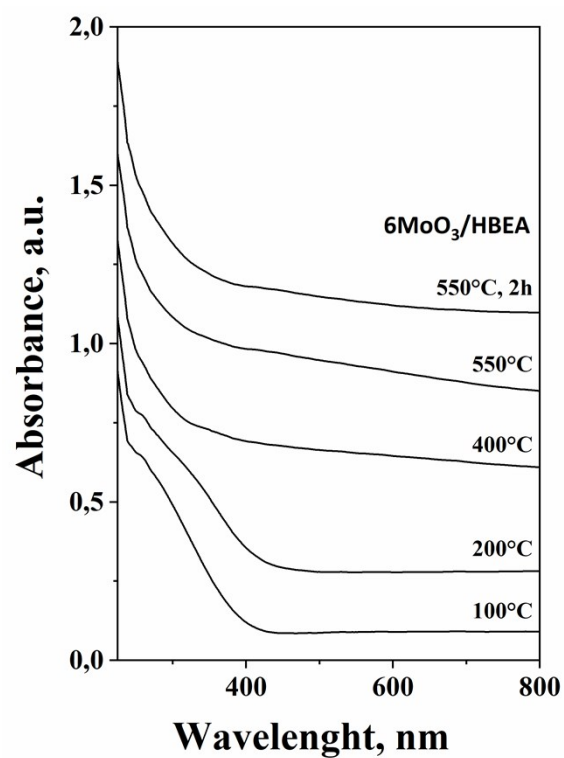

**Fig. S5** In-situ UV-VIS spectra of the 6MoO<sub>3</sub>/HBEA catalysts. The catalyst was heated at a rate of 10 °C/min up to 550 °C for 2 h in Ar flow.

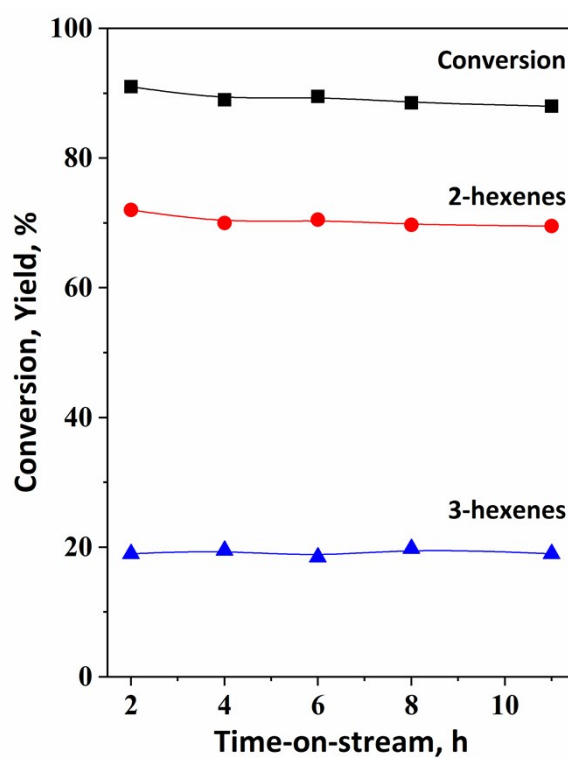

**Fig. S6** Isomerization of 1-hexene using H-BEA catalyst at 150 °C and 3 g<sub>cat</sub> g<sub>1-hexene</sub><sup>-1</sup> h space time using Ar as carrier gas in atmospheric pressure.

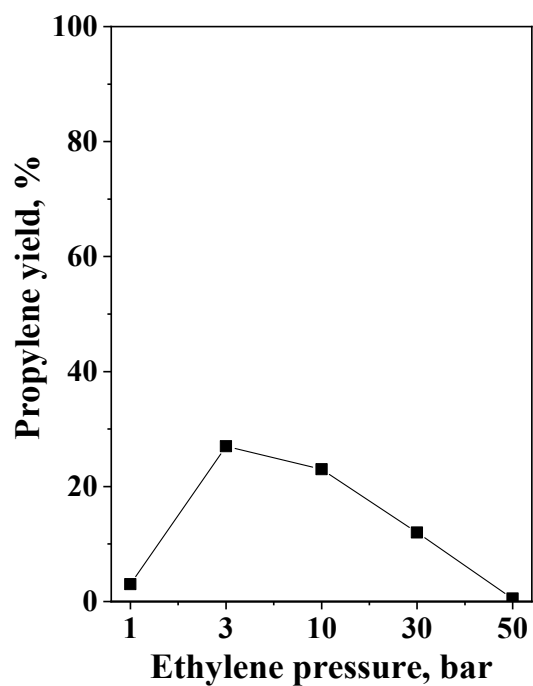

**Fig. S7** Propylene yield in ethenolysis of hexene mixture (Fig. S6) at different ethylene pressures using  $12\text{MoO}_3/\text{Al}_2\text{O}_3$  at  $25\text{ }^\circ\text{C}$  and  $6\text{ g}_{\text{cat}}\text{ g}_{\text{reactant}}^{-1}\text{ h}$  space time.

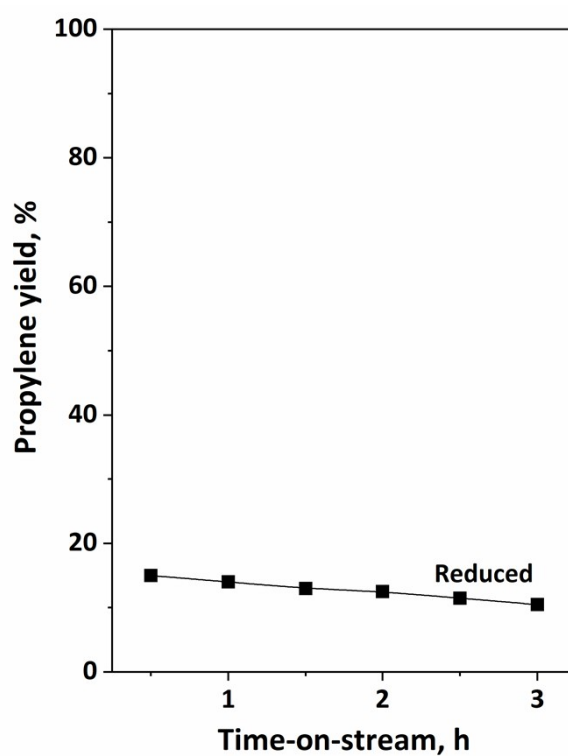

**Fig. S8** Propylene yield as a function of time on stream in ISOMET of 1-hexene using HBEA and  $12\text{MoO}_3/\text{Al}_2\text{O}_3$  catalyst mixture at  $75\text{ }^\circ\text{C}$  and  $6\text{ g}_{\text{cat}}\text{ g}_{1\text{-hexene}}^{-1}\text{ h}$  space time under 3 bar ethylene pressure. The catalyst mixture was reduced at  $550\text{ }^\circ\text{C}$  for 2 hours under atmospheric pressure using 5 %  $\text{H}_2/\text{Ar}$ .

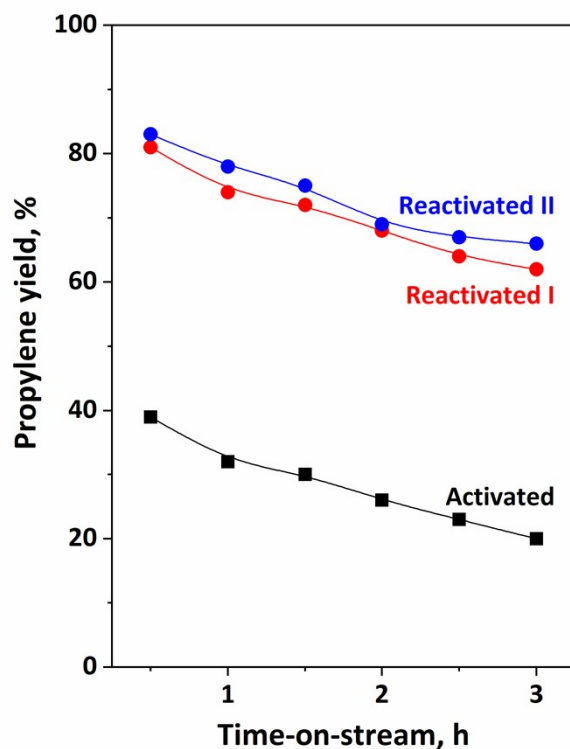

**Fig. S9** Propylene yield as a function of time on stream over HBEA and  $12\text{MoO}_3/\text{Al}_2\text{O}_3$  catalyst mixture after activation and two consecutive reactivation in Ar in ISOMET of 1-hexene at  $75\text{ }^\circ\text{C}$  and  $6\text{ g}_{\text{cat.}}\text{ g}_{1\text{-hexene}}^{-1}\text{ h}$  space time under 3 bar ethylene pressure.

*Activation:* the *ex-situ* calcined catalyst was *in-situ* pre-treated in 5 %  $\text{H}_2/\text{Ar}$  or Ar flow ( $50\text{ ml min}^{-1}$ ) at  $550\text{ }^\circ\text{C}$  for 2 h.

*Reactivation:* after 3 h of TOS in 1-hexene ISOMET the catalyst was purged in a flow of Ar ( $50\text{ ml min}^{-1}$ ) for 0.5 h at  $75\text{ }^\circ\text{C}$  to desorb olefins, then heated to  $550\text{ }^\circ\text{C}$  at a ramp rate of  $10\text{ }^\circ\text{C min}^{-1}$ , and maintained at this temperature for 2 h.

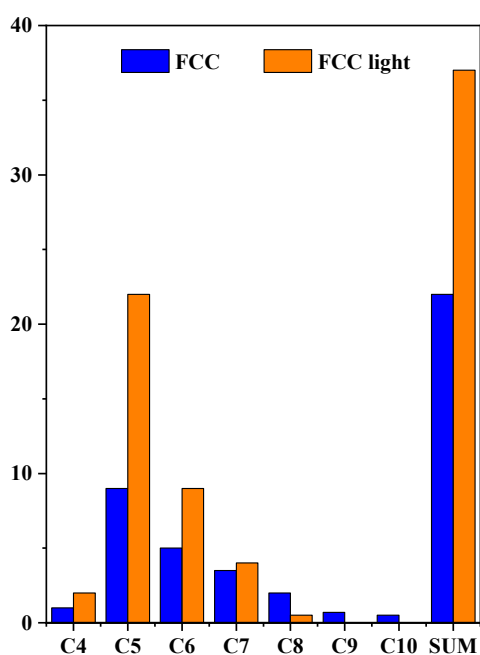

**Fig. S10** Olefin content of FCC and FCC light fractions.

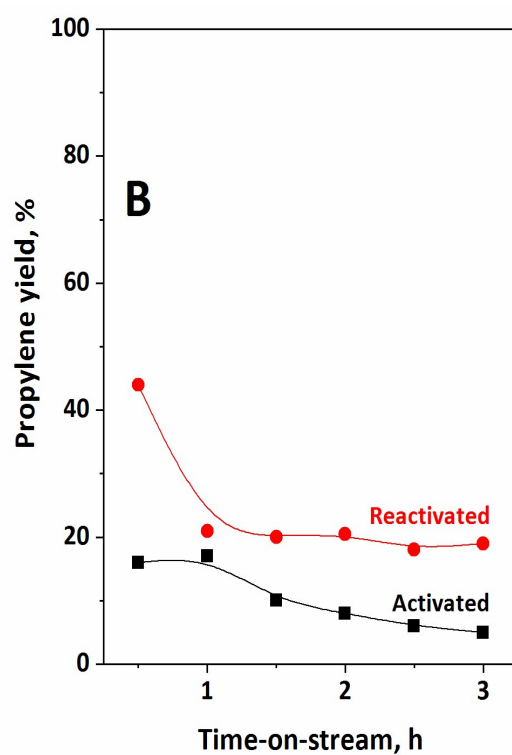

**Fig. S11** ISOMET of FCC light using  $13\text{MoO}_3/\text{HBEA}$  catalyst at  $75\text{ }^\circ\text{C}$  and under 3 bar ethylene pressure.
